1       **“It’s a moving target”: Experiences of pacing to reduce symptom exacerbation among adults living with**  
2               **Long COVID – Results from an international community-engaged qualitative research study**

3  
4       **Short Title: “It’s a moving target”: pacing as a strategy to reduce symptom exacerbation among adults**  
5               **living with Long COVID**

6  
7       **Authorship**

8       Kiera McDuff<sup>1</sup>, Darren A. Brown<sup>2,3</sup>, Natalie St. Clair-Sullivan<sup>4,5</sup>, Soo Chan Carusone<sup>6</sup>, Kristine M. Erlandson<sup>7</sup>,  
9       Lisa Avery<sup>8,9</sup>, Ciaran Bannan<sup>10,11</sup>, Colm Bergin<sup>10,11</sup>, Angela M. Cheung<sup>12,13,14</sup>, Richard Harding<sup>15</sup>, Mary Kelly<sup>2</sup>,  
10       Jessica M. Martin<sup>1</sup>, Lisa McCorkell<sup>16</sup>, Sarah O’Connell<sup>17</sup>, Imelda O’Donovan<sup>17</sup>, Margaret O’Hara<sup>18</sup>, Niamh  
11       Roche<sup>17</sup>, Ruth Stokes<sup>17</sup>, Catherine Thomson<sup>2</sup>, Liam Townsend<sup>10,11</sup>, Jaimie H. Vera<sup>4,5</sup>, Hannah Wei<sup>19</sup>, Patricia  
12       Solomon<sup>20</sup>, Kelly K. O’Brien<sup>1,12,23,24</sup>

13  
14       **Affiliations**

15       <sup>1</sup>Department of Physical Therapy, Temerty Faculty of Medicine, University of Toronto, Toronto, Ontario,  
16       Canada

17       <sup>2</sup>Long COVID Physio, London, United Kingdom

18       <sup>3</sup>Therapies Department, Chelsea and Westminster Hospital NHS Foundation Trust, London, United Kingdom

19       <sup>4</sup>Department of Global Health and Infection, Brighton and Sussex Medical School, University of Sussex,  
20       Brighton, United Kingdom

21       <sup>5</sup>Royal Sussex Hospital, Brighton and Sussex University Hospitals NHS Trust, Brighton, United Kingdom

22       <sup>6</sup>McMaster Collaborative for Health and Aging, McMaster University, Hamilton, Ontario, Canada

23       <sup>7</sup>University of Colorado Denver, Anschutz Medical Campus, Aurora, Colorado, United States

24       <sup>8</sup>Biostatistics Department, Princess Margaret Cancer Centre, University Health Network, Toronto, Ontario,  
25       Canada

26       <sup>9</sup>Dalla Lana School of Public Health, University of Toronto, Toronto, Ontario, Canada

27       <sup>10</sup>Department of Infectious Diseases, St James’s Hospital, Dublin, Ireland

28       <sup>11</sup>Department of Clinical Medicine, Trinity College Dublin, Dublin, Ireland

29       <sup>12</sup>Institute of Health Policy, Management and Evaluation (IHPE), Dalla Lana School of Public Health,  
30       University of Toronto, Toronto, Ontario, Canada

31       <sup>13</sup>Department of Medicine, University of Toronto, Toronto, Ontario, Canada

32       <sup>14</sup>Department of Medicine, University Health Network, Toronto, Ontario, Canada

33       <sup>15</sup>Florence Nightingale Faculty of Nursing Midwifery and Palliative Care, Cicely Saunders Institute, King’s  
34       College London, London, United Kingdom

35       <sup>16</sup>Patient-Led Research Collaborative, Oakland, California, United States

36       <sup>17</sup>Long COVID Advocacy Ireland, Ireland

37       <sup>18</sup>Long Covid Support, Birmingham, United Kingdom

38       <sup>19</sup>Patient-Led Research Collaborative, Ottawa, Ontario, Canada

39       <sup>20</sup>School of Rehabilitation Science, Faculty of Health Sciences, McMaster University, Hamilton, Ontario,  
40       Canada

41       <sup>23</sup>Rehabilitation Sciences Institute (RSI), University of Toronto, Toronto, Ontario, Canada

42       <sup>24</sup>Long COVID Physio, Toronto, Ontario, Canada

43  
44       **ORCID IDs**

45       Kiera McDuff: 0000-0003-0331-6919

46       Darren A. Brown: 0000-0002-4956-243X

47       Natalie St. Clair-Sullivan: 0000-0003-1097-0759

48       Soo Chan Carusone: 0000-0003-3977-0523

49 Kristine M. Erlandson: 0000-0003-0808-6729  
50 Lisa Avery: 0000-0002-8431-5143  
51 Ciaran Bannan: 0000-0002-9288-8574  
52 Colm Bergin: 0000-0002-6651-1132  
53 Angela M. Cheung: 0000-0001-8332-0744  
54 Richard Harding: 0000-0001-9653-8689  
55 Mary Kelly  
56 Jessica M. Martin  
57 Lisa McCorkell: 0000-0002-3261-6737  
58 Sarah O’Connell  
59 Imelda O’Donovan  
60 Margaret O’Hara: 0000-0001-9812-5183  
61 Niamh Roche  
62 Ruth Stokes  
63 Catherine Thomson  
64 Liam Townsend: 0000-0002-7089-0665  
65 Jaimie H. Vera: 0000-0002-1165-0573  
66 Hannah Wei: 0000-0002-0307-7498  
67 Patricia Solomon: 0000-0002-5014-0795  
68 Kelly K. O’Brien: 0000-0002-1632-6537  
69

70 **Keywords:** Long COVID, pacing, rehabilitation, post-exertional malaise/post-exertional symptom  
71 exacerbation, living strategy, self-management, episodic disability  
72

73 **Word count:** 7388  
74  
75  
76  
77  
78  
79  
80  
81  
82  
83  
84  
85  
86  
87  
88  
89  
90  
91  
92  
93  
94  
95  
96  
97  
98

99 **ABSTRACT - Words: 296/300**

100 **Introduction:** Long COVID is a multisystem condition that negatively impacts daily function. Pacing is a self-  
101 management strategy to mitigate symptoms. Our aim was to describe experiences of pacing from the  
102 perspectives of adults living with Long COVID.

103 **Methods:** We conducted a community-engaged qualitative descriptive study involving one-on-one online  
104 interviews with adults living with Long COVID from Canada, Ireland, United Kingdom, and United States to  
105 explore experiences of disability. We asked participants about strategies they used to deal with health  
106 challenges living with Long COVID. Interviews were audio recorded and transcribed verbatim. We analyzed  
107 data using group-based content analytical techniques.

108 **Results:** Among the 40 participants living with Long COVID, the majority were women (n=25; 63%), white  
109 (n=29;73%) and heterosexual (n=30;75%). The median age of participants was 39 years (25th, 75th  
110 percentile: 32, 49). Most participants (n=37;93%) used pacing to mitigate or prevent symptoms. Participant  
111 described experiences of pacing across five main areas: 1) using pacing as a living strategy (pacing to mitigate  
112 multidimensional health challenges; applying pacing to many types of activities; process of pacing  
113 experienced as a moving target; pacing experienced as a helpful strategy, but not a cure for Long COVID); 2)  
114 learning how to pace (acquiring knowledge about pacing; developing strategies and skills to support pacing);  
115 3) encountering challenges with pacing (learning how to pace; experiencing inequitable access to pacing;  
116 experiencing stigma and judgement; undergoing psychological and emotional adjustment from beliefs of  
117 ‘fighting’ or ‘pushing through’ to balancing rest with activity; making sacrifices; and encountering unexpected  
118 obstacles); 4) experiencing consequences of not pacing; and 5) conceptualising and describing pacing using  
119 analogies or metaphors.

120 **Discussion:** Pacing is a challenging and complex strategy used to mitigate symptoms of Long COVID.  
121 Healthcare providers should work collaboratively with patients to further refine and implement this strategy,  
122 when appropriate.

123

## 124 INTRODUCTION

125 Long COVID, also known as Post-COVID Condition (PCC), is a prevalent and disabling chronic multisystem  
126 condition that impacts the health of millions of people (1). The National Academies of Sciences, Engineering,  
127 and Medicine (NAEM) defines Long COVID as “an infection-associated chronic condition (IACC) that occurs  
128 after a SARS-CoV-2 infection and is present for at least 3 months as a continuous, relapsing and remitting, or  
129 progressive disease state that affects one or more organ symptoms” (2). Estimates of the prevalence of Long  
130 COVID among people previously infected with SARS-CoV-2 range between 10-35% (2-4). The most common  
131 symptoms of Long COVID include extreme exhaustion or fatigue, post-exertional symptom exacerbation  
132 (PESE) or post-exertional malaise (PEM), shortness of breath, cognitive impairment (such as memory  
133 impairment, difficulty problem solving), and dizziness on sitting or standing (such as orthostatic intolerance)  
134 (5). Over 200 symptoms of Long COVID have been identified (6). The majority of people living with Long  
135 COVID report that their symptoms negatively impact their daily function and social participation (6, 7).

136 The symptoms and impairments of Long COVID and their impact on daily function represent  
137 disability, broadly defined as any physical, cognitive, mental and emotional health challenges, activity  
138 limitations, uncertainty about the future, and challenges to social inclusion (including return to work, family  
139 life, relationships, and ability to care for others) (8-11). For many individuals living with Long COVID, their  
140 health challenges may fluctuate over time, characteristic of episodic disability (8, 11-13). For example, PESE  
141 or PEM, the worsening of symptoms after exertion, are common symptoms of Long COVID (14, 15).

142 Fluctuations in disability may be unpredictable for people living with Long COVID, making it difficult to plan  
143 for the future and maintain or return to employment (8, 12, 13). Uncertainty is a dimension of disability  
144 among people living with Long COVID which may exacerbate symptoms (11). Long COVID poses substantial  
145 individual health, workforce, and economic burdens (16).

146 No approved treatment or cure for Long COVID exists (17). In the absence of effective treatments or  
147 cures, people living with Long COVID have adopted strategies to help manage and mitigate some of the  
148 associated symptoms and disability (18, 19). In the context of episodic disability, the behaviours, attitudes,

149 and beliefs that patients adopt to manage their disability are referred to as living strategies (20). These living  
150 strategies include pharmacological treatments (e.g., over-the-counter medications), dietary alterations (e.g.,  
151 supplements, eating low-histamine foods), and energy management (8, 21, 22). Often, people living with  
152 Long COVID adopt living strategies through their own trial and error, and may be based on advice from  
153 others living with disability (18, 19, 23).

154 Pacing is a living strategy that people living with Long COVID can adopt to manage their energy and  
155 navigate everyday life (18). Pacing is an approach that balances rest and activities in daily life, to manage  
156 symptoms such as fatigue and PESE or PEM (18, 24). Pacing has been utilised by people living with a range of  
157 health conditions, such as myalgic encephalomyelitis/chronic fatigue syndrome (ME/CFS), cancer, and  
158 arthritis (25). There are multiple potential goals and types of pacing within the context of energy  
159 management or conservation (24). For example, quota-contingent pacing is used to gradually increase  
160 activities, while symptom-contingent pacing guides activities based on perceived symptom levels to avoid  
161 symptom-exacerbation (26, 27). In the context of rehabilitation, it is important to consider and select the  
162 most appropriate types of pacing and energy management strategies for the patient population. For  
163 example, pacing strategies with the goal to increase activity (such as quota-contingent pacing) may not be  
164 safe or appropriate for people with Long COVID (24, 27, 28). Despite existing clinical guidelines, there is  
165 significant variability in the implementation of pacing as a living strategy among people living with Long  
166 COVID (24, 29).

167 There is a clinical need to understand pacing as a living strategy for people living with Long COVID, and  
168 other energy-limiting chronic conditions. It is important to understand the experiences of pacing and  
169 strategies used in the context of Long COVID to help inform clinical practice and research to mitigate  
170 disability. Our aim was to describe the experiences of pacing from the perspectives of adults living with Long  
171 COVID.

172

173 **MATERIALS & METHODS**

174 **Study Design**

175 We analyzed interview data from interviews collected as part of the Long COVID and Episodic Disability  
176 study, a community-engaged qualitative descriptive study involving one-on-one online interviews with adults  
177 living with Long COVID (8). The primary aim of the parent study was to describe experiences of episodic  
178 disability among adults living with Long COVID (8). Detailed methods for the Long COVID and Episodic  
179 Disability Study have been previously published (9). The study was approved by the University of Toronto  
180 Health Sciences Research Ethics Board (protocol #41749). For this study, we specifically focused our analysis  
181 on interview data pertaining to the experiences of pacing.

182

183 **Patient and Public Involvement**

184 The Long COVID and Episodic Disability Study is a community-engaged research study involving over 25  
185 persons living with Long COVID, researchers, and clinicians (categories are not mutually exclusive). People  
186 with lived experiences with Long COVID were involved in all phases throughout the study including  
187 conceptualisation, acquisition of funding and proposal development, recruitment and data collection,  
188 analysis and interpretation, and knowledge mobilization. During development of the study proposal, patient  
189 advocates from organisations in Canada, Ireland, UK, and US, who were linked to larger networks of people  
190 living with Long COVID, were purposefully invited to join the study team. Long COVID community networks  
191 and organisations, represented by persons living with Long COVID, were involved in all stages of the  
192 research, including: COVID Long Haulers Support Group Canada, Long COVID Ireland, Long COVID Physio,  
193 Long Covid Support, and the Patient-Led Research Collaborative (30-34). Team members with lived  
194 experiences were provided yearly remuneration for their time and expertise dedicated to the study, either as  
195 an individual, or to the community organization which they represented on the study.

196

197 **Participants and Recruitment**

198 Participants included adults ( $\geq 18$  years old) who self-identified as living with Long COVID from Canada,  
199 Ireland, United Kingdom (UK) and United States (US), defined as signs and symptoms that develop during or  
200 following an infection consistent with COVID which continue for 12 weeks or more and are not explained by  
201 an alternative diagnosis (35). Community collaborators recruited participants between December 7, 2021  
202 and May 2, 2022 through the five online community support groups and organisations for Long COVID  
203 represented on the study team in Canada, Ireland, UK, and US (30-34). Participants in the Long COVID and  
204 Episodic Disability study were recruited to represent adults living with Long COVID across the four countries,  
205 with diversity in gender, age, and sexual orientation. All participants provided informed written or verbal  
206 consent. Participants were offered a CAN\$30/€20/£15/US\$20 electronic gift card for their participation in  
207 the study.

208

#### 209 **Data Collection**

210 Online semi-structured interviews were conducted by four members of the research team (KKO, KM, NS, BT)  
211 via Zoom between December 2021 and May 2022. We used the Episodic Disability Framework to develop the  
212 interview guide which included the following areas of inquiry: dimensions of disability; contextual factors,  
213 including living strategies such as pacing; and triggers of disability (36, 37). During the interview, participants  
214 were asked, “Did you adopt any other living or coping strategies to help you deal with the health challenges  
215 and ups and downs of disability living with Long COVID?” Following the interview, we administered a web-  
216 based questionnaire to collect demographic information (including sex, gender, race, sexuality, employment  
217 information, and Long COVID symptoms or characteristics). The interviewer followed up with each  
218 participant the day after the interview to check in on participants’ wellbeing following the interview and to  
219 provide suggestions for support services if appropriate.

220

#### 221 **Data Analysis**

222 We analyzed interview data from the Long COVID and Episodic Disability study that specifically pertained to  
223 the construct of pacing. We used a group-based analysis with conventional content analytical techniques (38)  
224 with portions of the interview data specific to experiences of pacing. Interview data were analysed  
225 collectively as one sample (not by country). We developed a coding framework informed by key words  
226 related to pacing (e.g. pacing, energy conservation, rest) through literature review and consultation with  
227 team members with lived experiences with Long COVID by one author (KM) while allowing for additional  
228 codes to emerge from the data. All transcripts were coded line-by-line using the coding framework. A  
229 preliminary coding summary was produced which summarised key concepts, impressions, and reflections  
230 from the data. Three team members (DAB, KKO, and KM) met to discuss and refine the preliminary coding  
231 summary. Ten team members, including five with lived experiences with Long COVID (AC, SCC, KE, SG, MK,  
232 KM, LM, MO, CT, and LT) met to review the coding summary and provide reflections, validation, and  
233 interpretation of the findings. We used NVivo software to facilitate data management (39).

234

## 235 **RESULTS**

236 Forty adults living with Long COVID (10 per country) participated in interviews between December 2021 and  
237 May 2022. Participants were mostly female (n=29, 73%), white (n=29, 73%), heterosexual (n=30, 75%), with a  
238 median (25<sup>th</sup>, 75<sup>th</sup> percentile) age of 39 years (32, 49). Thirty-three participants (83%) were living with Long  
239 COVID for a year or longer, and 34 (93%) had experienced at least one relapse in their symptoms. Of the 40  
240 participants, 37 (93%) spoke about pacing or concepts related to pacing. Some participants explicitly named  
241 pacing (n=30;75%), while others referred to learning to incorporate more balance between rest and activity  
242 in their daily lives. See Table 1 for more details on participant characteristics.

243

244 **Table 1: Characteristics of participants (n=40)**

| Characteristics of Participants (n=40) |            | N (%)    |
|----------------------------------------|------------|----------|
|                                        | <b>Sex</b> |          |
|                                        | Female     | 29 (73%) |
|                                        | Male       | 11 (28%) |



| <b>Characteristics of Participants (n=40)</b>                                                                                |                                                               | <b>N (%)</b> |
|------------------------------------------------------------------------------------------------------------------------------|---------------------------------------------------------------|--------------|
| <b>Gender</b>                                                                                                                |                                                               |              |
|                                                                                                                              | Woman                                                         | 25 (63%)     |
|                                                                                                                              | Man                                                           | 11 (28%)     |
|                                                                                                                              | Non-Binary                                                    | 2 (5%)       |
|                                                                                                                              | Other: 'gender non-conforming'                                | 2 (5%)       |
| <b>Race</b>                                                                                                                  |                                                               |              |
|                                                                                                                              | White                                                         | 29 (73%)     |
|                                                                                                                              | Asian, South Asian or South East Asian                        | 4 (11%)      |
|                                                                                                                              | Black, Caribbean, African or African American                 | 3 (8%)       |
|                                                                                                                              | Mixed                                                         | 3 (8%)       |
|                                                                                                                              | First Nations, Native American, or Indigenous                 | 1 (3%)       |
| <b>Sexual Orientation / Sexuality</b>                                                                                        |                                                               |              |
|                                                                                                                              | Straight or Heterosexual                                      | 30 (75%)     |
|                                                                                                                              | Pansexual or Queer                                            | 4 (10%)      |
|                                                                                                                              | Gay or Lesbian                                                | 3 (8%)       |
|                                                                                                                              | Bisexual                                                      | 3 (8%)       |
| <b>Relationship Status</b>                                                                                                   |                                                               |              |
|                                                                                                                              | Single (never married; never registered in civil partnership) | 19 (48%)     |
|                                                                                                                              | Married                                                       | 17 (43%)     |
|                                                                                                                              | Separated but still legally married, or divorced              | 3 (8%)       |
|                                                                                                                              | In a registered civil partnership                             | 1 (3%)       |
| <b>Highest level of education</b>                                                                                            |                                                               |              |
|                                                                                                                              | Completed university or college                               | 19 (48%)     |
|                                                                                                                              | Post-graduate education                                       | 17 (43%)     |
|                                                                                                                              | Completed trade or technical training                         | 3 (8%)       |
|                                                                                                                              | Completed secondary / high school                             | 1 (3%)       |
| <b>Changed Employment Since Living with Long COVID</b>                                                                       |                                                               |              |
|                                                                                                                              | Yes (unable to work / on leave of absence due to Long COVID)  | 20 (50%)     |
|                                                                                                                              | Yes (lost job or now unemployed due to Long COVID)            | 6 (15%)      |
|                                                                                                                              | Yes (work reduced hours due to Long COVID)                    | 5 (13%)      |
|                                                                                                                              | Yes (changed employment role or job due to Long COVID)        | 4 (10%)      |
|                                                                                                                              | No – Unchanged employment status                              | 5 (13%)      |
| <b>Receives help or support because of long-term physical or mental health conditions or illnesses related to Long COVID</b> |                                                               | 11 (28%)     |

245

246 **Experiences of Pacing**

247 Participants described experiences of pacing across five main areas: 1) using pacing as a living strategy; 2)

248 learning how to pace; 3) encountering challenges with pacing, 4) experiencing consequences of not pacing,

249 and 5) conceptualising and describing pacing using analogies and metaphors. The following sections describe

250 each area in detail, with supporting quotations from the interviews referenced by participant number and

251 country. See Figure 1.

252  
253  
254  
255

*Insert Figure 1: Experiences of Pacing*

**1) Using pacing as a living strategy**

256 Participants described pacing as a living strategy to prevent, manage, or mitigate multidimensional health  
257 challenges (physical, mental, emotional, cognitive, and social) associated with Long COVID, including PESE  
258 and PEM. Pacing involved balancing activity and rest. Pacing helped participants reduce symptom severity or  
259 exacerbation, and crashes or relapses. Consistent pacing was required to maintain a lower presence and  
260 severity of symptoms. We describe further details of pacing as living strategy below.

261

***Pacing to mitigate multidimensional health challenges***

263 Participants described different dimensions and factors to be considered when pacing (including emotional,  
264 cognitive, and physical exertion). Participants described pacing or limiting social interactions, such as “visits  
265 or my phone calls” (P29, Canada); cognitive tasks, like “listening to a podcast” (P26, US); as well as physical  
266 tasks (e.g. housekeeping and meal preparation).

267 Many participants explained that they only became aware of the energy required to complete  
268 physical, cognitive, social or emotional tasks after they developed Long COVID. One participant explained  
269 that it was easy for them to understand how they could pace physical tasks; however, realising that cognitive  
270 tasks could also be fatiguing was “like a revelation” (P7, Ireland). Effective pacing required finding a balance  
271 between different types of exertion. “It’s like I have to pick one. Either I’m going to go through the mail or I’m  
272 going to do chores but I can’t do both.” (P28, US).

273

***Applying pacing to many types of activities***

275 Participants described pacing many types of activities. For participants experiencing severe impairment, the  
276 most essential activities (basic activities of daily living) had to be paced. As one participant reported: “For a  
277 while there it was even pacing how often I go to the loo just because of that extra few steps and that little bit  
278 more energy. It’s just simple things like that you just take for granted.” (P5, UK). Other participants were

279 pacing day-to-day activities (such as going to appointments or managing paperwork). For example, *“If I drive*  
280 *somewhere, even if it’s a short distance like a 15- or 20-minute drive, I’ll have to pull in the car, park and sleep*  
281 *or nod off for a while before I have the energy to go the next bit.”* (P36, Ireland).

282 Those who were working at the time of their interview described applying pacing and energy  
283 conservation strategies in the workplace. They found they were more successful with slower and more  
284 flexible schedules so that they could spread out difficult and energy-intensive tasks. For example:

285 *“If I had a full day [of work] with 14 assessments in it, then it might be a different kettle of fish... If I*  
286 *have a day then where there’s not too much happening, that’s okay and I’m able to gain kind of*  
287 *energy for the next few days... I think I am pacing quite well.”* – P8, Ireland

288 Participants described that they had to re-learn their energy capacity when it came to the tasks  
289 involved in their jobs (e.g., more cognitively demanding vs. more passive), and pace their work days  
290 accordingly. This participant incorporated pacing to manage meetings at work:

291 *“...because I get shortness of breath while I’m talking in meetings, I like have someone watch my dog*  
292 *because if I have to like take her on walks, I can’t. I won’t be able to like do my meetings. I may ask*  
293 *other people to facilitate more of my meetings because I can’t talk and I’ll get shortness of breath... I*  
294 *have to make meetings shorter so I can like limit the air and cognitive... I’ll space meetings out as*  
295 *much as I can so that I can recover and... so I don’t lose as much of my cognitive functioning.”* – P35,  
296 US

297 Social interactions, such as visits with friends or family, and going to a coffee shop, and leisure  
298 activities also required pacing. One participant explained they were surprised that colouring could trigger an  
299 episode of PESE, likely *“related to having to think about choosing the colours and things like that... what*  
300 *colour do I choose and where do I paint it?”* (P30, US). They were excited to have gradually built up to 20-30  
301 minutes of colouring at a time. Another participant described resting for two days in order to participate in a  
302 drumming class without triggering a crash. Ultimately descriptions of pacing shared by participants spanned  
303 all types of activities involving physical, emotional, or cognitive exertion.

304

305 ***Process of pacing experienced as a moving target***

306 Despite the benefits, the process of pacing was experienced as “a moving target” (P24, US); trial and error  
307 were required to achieve a successful balance of rest and activity, and to maintain this balance as presence  
308 and severity of symptoms changed over time. Pacing did not involve a linear or predictable progression  
309 toward less symptom burden. As this participant described, “It’s not like I can just like say okay I rested  
310 yesterday, so I’ll be fine today... It’s just that I’d have a better chance of being able to have this chat with  
311 you.” (P9, Ireland). Despite ongoing pacing, some participants described they had reached “a plateau” (P24,  
312 US) in terms of how much symptom improvement they experienced. They were facing the same energy  
313 limitations but had learned how to achieve some function within their limits.

314 *“The couple of hours I have now a day where I’m functioning like now, I’m functioning at a better*  
315 *level than I was six months ago or a year ago. But... I’m still very limited in those couple of hours a*  
316 *day... I’ve understood more as time’s gone on about pacing... I would say it’s a smoother ride now but*  
317 *that’s not because my symptoms are getting better. It’s because I’m understanding more about my*  
318 *limitations.” – P19, UK*

319

320 ***Pacing experienced as a helpful living strategy, but not a cure for Long COVID***

321 Rather than eliminate all symptom exacerbation and crashes associated with Long COVID, pacing was  
322 experienced as helpful for reducing the frequency or severity of crashes. One participant described that their  
323 crashes tended to be shorter “as I’ve gotten better at managing my energy like envelope” and “as long as I  
324 go to bed and rest and don’t do anything” once they begin to ‘hit their limit’ of activity (P24, US).

325 Participants were clear that reducing their symptoms and crashes was helpful, but did not result in  
326 recovery from Long COVID. As this participant explained:

327 *“People are changing their life and pacing so that their symptoms are lower. You know that’s getting*  
328 *better, not like spontaneously healing [from Long COVID]... I think that there’s something going on*

329 *inside of us that's causing ongoing damage and I just really feel like until that stops, you know*  
330 *healing [from Long COVID], that's not going to be successful."* – P34, US

331

## 332 **2) Learning how to pace**

333 Participants described experiences with learning how to pace. They discussed sources of information about  
334 pacing, and their successes, failures, and challenges with learning how to pace.

335

### 336 ***Acquiring knowledge about pacing***

337 Many participants learned about pacing through resources in online community support groups and their  
338 own trial and error. As one participant explained, *"it's just been my own research that has helped me to find*  
339 *things that help"* (P8, Ireland). This involved reading, watching videos or webinars online, and staying current  
340 on research. Many participants recognised that pacing was how *"people have been doing it for years with*  
341 *[ME/CFS]"* (P10, Ireland). Participants sought out knowledge about pacing from community support groups  
342 or individuals online with other energy-limiting chronic conditions such as ME/CFS or Lupus.

343 Self-directed learning was often undertaken by participants without formal support from healthcare  
344 professionals. For some participants, they found online resources on their own before receiving any guidance  
345 or support from a health care provider. One person described that their doctor, *"...didn't give me any advice.*  
346 *It was just, 'You'll get better with time'. Well, I'm still not better. So, I have had to learn and educate myself."*  
347 (P34, US). They went on to say, *"When I finally got to the good Long COVID clinic and they wanted me to see*  
348 *someone for physical therapy, you know he was talking about pacing. But at that point I already know. I've*  
349 *done the self-education."* (P34, US). They said the resources on ME Action's website (40), *"...really, I think*  
350 *saved me from getting a lot worse"* (P34, US).

351 Complex and energy-limiting chronic condition communities and support groups were described as  
352 bridging the gap in formal healthcare supports for pacing and other living strategies. As the Long COVID

353 community began to develop, specific support groups for Long COVID emerged and shared resources on  
354 pacing.

355 *“My best friend has lupus... So, I found out about Spoon Theory through my friend and that sort of*  
356 *became part of our like lexicon of conversation, just in me checking in with her. Then you know just*  
357 *finding that in the Long COVID community and the dysautonomia communities and then ME/CFS*  
358 *communities.” – P40, US*

359 Although many participants lacked access to healthcare providers who were knowledgeable about  
360 pacing, some learned about pacing through specialty Long COVID clinics, fatigue-management programs, or  
361 specialised providers. However, some described challenges finding specialised and knowledgeable providers,  
362 and wait times were long.

363 *“I’ve been to two Long COVID clinics, one a horrible experience where the doctor at the Long COVID*  
364 *clinic told me that my physical pain was due to anxiety when I continually told him I wasn’t*  
365 *experiencing any mental health issues. The second Long COVID clinic is fine. So, I’m still seeing them.*  
366 *Then yeah, I’m seeing now like a chronic fatigue syndrome and Long COVID like expert. The most*  
367 *useful advice that the people who actually know what they’re talking about have is really like just*  
368 *pacing.” – P34, US*

369 Types of health providers mentioned as providing helpful information and support for pacing  
370 included occupational therapists and physiotherapists. These providers offered individualised support and  
371 guidance on pacing.

372 *“I started the therapy and they tried to like space things out because they know it’s taxing on people.*  
373 *So that’s why they tend to do like one thing at a time. But I was also... I started working with the*  
374 *[occupational therapist] somewhere in there with therapy sessions as well because I needed some*  
375 *help around pacing. I expressed that a COVID education group wasn’t enough for me... Like the*  
376 *reason why I wanted to go to Integrated Chronic Care Services was because I needed help with pacing*  
377 *because I couldn’t figure it out for myself.” – P38, Canada*

378 ***Developing strategies and skills to support pacing***

379 Participants described strategies and skills that they developed to support their success with pacing. For  
380 most participants, multiple strategies or skills were implemented together to help manage symptoms living  
381 with Long COVID. For example, *“Definitely planning, pacing, resting, being mindful of what I do in my day*  
382 *[have helped me manage Long COVID]”* (P20, UK).

383 Effective pacing required high-level planning and prioritisation skills. Participants carefully  
384 identified activities that were most important and would break their weeks and days down (‘chunking’) to  
385 accomplish those tasks. The remainder of their time was dedicated to rest, which was identified as a priority  
386 and itself a meaningful activity. For example, *“If I want to see my friends... I have to plan kind of a rest day, or*  
387 *days”* (P32, UK). Basic activities of daily living, like meal preparation, also had to be prioritised and planned:

388 *“If I knew that I was going to be downstairs for most of the day... I take what I need from upstairs. So,*  
389 *I’ve got everything laid out for downstairs. I think ahead about what I’m cooking or you know I’d cook*  
390 *with little stools so I’m sitting down for all of it. Just little kind of hacks that you could do to make*  
391 *your life easier... And I just let go of a lot of things. I was always a person that would do DIY on a*  
392 *weekend, do this, do that... I just stopped. I’ve kind of released a lot of things. It took quite a [lot of]*  
393 *pressure thinking I had to do this, I had to do that.”* – P1, UK

394 Incorporating rest and reducing energy expenditure while completing priority tasks through the use  
395 of equipment and aids was an important strategy involved in pacing. For example, sitting on a stool while  
396 cooking, or using mobility aids like canes or wheelchairs. Simple aids could be very useful, like an alarm as a  
397 reminder of a scheduled rest break.

398 Participants described developing acceptance and awareness of the energy required to complete an  
399 activity, and to notice patterns of symptom exacerbation to guide their pacing strategies. Some described  
400 acceptance as coming with time; others found mindfulness was a helpful strategy to cultivate awareness and  
401 acceptance. One participant described achieving a better understanding of rest through mindfulness:

402            *“The mindfulness... That just being in the moment and being able to kind of relax your body so your*  
403            *body is actually resting, because ... in the beginning, I was feeling like I was resting but I wasn’t*  
404            *getting my energy back. But I wasn’t actually resting because I wasn’t kind of focused out. I was*  
405            *thinking of other things or I had the television on or something else. So yeah, I find now... that I’ve*  
406            *learned that, that I can actually... rest my body and I will feel rested after that. So that’s a bonus,*  
407            *yeah. Mindfulness is a big thing, yeah.” – P9, Ireland*

408

### 409            **3) Encountering challenges with pacing**

410            Participants described challenges with pacing in six areas including: 1) learning how to pace; 2) experiencing  
411            inequitable access to pacing; 3) experiencing stigma and judgement; 4) undergoing psychological and  
412            emotional adjustment from beliefs of ‘fighting’ or ‘pushing through’ to balancing rest with activity; 5) making  
413            sacrifices; and 6) encountering unexpected obstacles.

414

#### 415            ***Learning how to pace***

416            Learning how to pace was difficult as pacing was a new skill for participants that they were learning while  
417            experiencing health challenges, often without formal supports. Participants described living with the health-  
418            related challenges of Long COVID for some time, experiencing ups and downs in their symptoms, before  
419            learning about pacing and being able to achieve some symptom stabilisation. Some participants felt they  
420            would have benefited from more support in the process of learning how to pace.

421

#### 422            ***Experiencing inequitable access to pacing***

423            Another challenge was that participants experienced inequitable access to pacing as a living strategy. Some  
424            participants described feeling lucky to have the means and the freedom to plan and prioritise rest in their life  
425            to enable pacing. In addition to financial supports, access to social supports, such as daycare or help from



426 friends/family, facilitated access to pacing. However, for participants who did not have access to such  
427 supports, planning and prioritising rest to facilitate pacing may not have been an option.

428

#### 429 ***Experiencing stigma and judgement***

430 Many participants experienced stigma and judgement related to their efforts to pace. Participants described  
431 a lack of support from others (including friends, family, and health care providers) for pacing, stemming from  
432 poor understanding of energy limitations associated with Long COVID. Participants identified accepted  
433 cultural norms about productivity and ableism that made pacing difficult to adopt since pacing and rest are in  
434 conflict with productivity.

435

#### 436 ***Undergoing psychological and emotional adjustment from beliefs of ‘fighting’ or ‘pushing through’ to 437 balancing rest with activity***

438 Undergoing psychological and emotional adjustment from beliefs of ‘fighting’ or ‘pushing through’ to  
439 balancing rest with activity was challenging for many participants. Participants were torn between  
440 recognising the need for rest and the normal desire to do more in daily life.

441

#### 442 ***Making sacrifices***

443 Participants described that pacing often involves making sacrifices. This included ‘letting go’ of previous  
444 roles, responsibilities, leisure activities, and employment, in order to pace. Sacrificing social outings and  
445 leisure activities to prioritise basic activities of daily living and essential tasks often led to participants feeling  
446 limited and isolated. Sacrifices included decisions about whether to stop working in order to effectively pace;  
447 duties involved in work might push participants outside of their energy envelope when factoring in the  
448 energy already required for basic activities of daily living and essential roles.

449

#### 450 ***Encountering unexpected obstacles***

451 Encountering unexpected obstacles was another challenge faced when pacing. Participants’ best efforts at  
 452 pacing might be derailed by unexpected life events that couldn’t be avoided or delayed. Certain events or  
 453 activities were outside of their control or were essential to complete within a certain timeframe.

454

455 See Table 2 for supportive quotes for each of the challenges encountered by participants while pacing.

456

457 **Table 2:** Challenges with Pacing: Supportive Quotes

458

| Challenges with Pacing                    | Supportive Quotes                                                                                                                                                                                                                                                                                                                                                                                                                                                                                                                                                                                                                                                                                                                                                                                              |
|-------------------------------------------|----------------------------------------------------------------------------------------------------------------------------------------------------------------------------------------------------------------------------------------------------------------------------------------------------------------------------------------------------------------------------------------------------------------------------------------------------------------------------------------------------------------------------------------------------------------------------------------------------------------------------------------------------------------------------------------------------------------------------------------------------------------------------------------------------------------|
| Learning how to pace                      | <i>“I didn’t recognise that as a cycle because to be honest I heard the term chronic fatigue syndrome but I didn’t understand or know the details of it. I’d never heard the term ME. So, I didn’t know anything about resting and pacing. Whenever I’ve had any other injury, you just exercise yourself through it right? You know, more physio and that’s generally the way I think about it. So, I was sort of doing this little undulating thing throughout the fall.” – P29, Canada</i>                                                                                                                                                                                                                                                                                                                  |
|                                           | <i>“Pacing is just... it is so stressful. Like I could never do like a pacing group. Like that would just not be helpful for me. I needed that one-on-one and then like it’s also like hard for me to go into like the reference sheets that they give you right like that they email you like because I don’t have a printer.” – P38, Canada</i>                                                                                                                                                                                                                                                                                                                                                                                                                                                              |
| Experiencing inequitable access to pacing | <i>“Some people are making choices that aren’t choices because... they don’t have the income or the freedom... whether it be to take time off work because they just can’t or just working. They shouldn’t be [working], they know they shouldn’t be, they’ve been told to rest. I think that’s great; I totally agree. Also, if I don’t work, I’m going to not eat, so I’m going to work. And then they have all these strategies for working to make it work but it’s not working right because they’re really ill and they’re not going to get better at all because they’re overdoing it constantly. But I get it. If you’re going to choose between that and losing your home, you’re going to work. I think you have to be careful about choices and a lot of people don’t have them.” – P14, Canada</i> |
| Experiencing stigma and judgement         | <i>“I have a structure everyday... I pace myself. The physiotherapist wants me to stop sleeping in the afternoon. I disagree with her. I need that to recharge my battery, to function for the next couple of hours. She said no and I just say... I don’t argue because there’s no understanding of it.” – P6, Ireland</i>                                                                                                                                                                                                                                                                                                                                                                                                                                                                                    |
|                                           | <i>“It doesn’t help that my husband never sits down. He never sits down. He never rests. Yesterday his parents came up and then when I looked out the back window there was three of them up ladders cutting trees. They just, they never rest. They never sit down. He doesn’t understand my need to rest really... He’s trying to be understanding and all of that. But you know, ‘Are you on the sofa again?’ or ‘Are you having another nap?’ He doesn’t really get it.” – P8, Ireland</i>                                                                                                                                                                                                                                                                                                                 |
|                                           | <i>“We live in a very ableist world. So, it is... really hard to start to unstitch your self-worth from your productivity, to not be super hard on yourself and judge yourself as being a moral failure for not being able to clean your house, for not being able to you know cook healthy meals for your kids, for not being able to be the same active parent that you could be up until COVID.” – P25, Canada</i>                                                                                                                                                                                                                                                                                                                                                                                          |

| Challenges with Pacing                                                                                                            | Supportive Quotes                                                                                                                                                                                                                                                                                                                                                                                                                                                                                                                                                                                                                                                                                                                                                                                                                                                                                                                                                                                                                                                                                                                                                                                                                                                                                                                                                                                                                            |
|-----------------------------------------------------------------------------------------------------------------------------------|----------------------------------------------------------------------------------------------------------------------------------------------------------------------------------------------------------------------------------------------------------------------------------------------------------------------------------------------------------------------------------------------------------------------------------------------------------------------------------------------------------------------------------------------------------------------------------------------------------------------------------------------------------------------------------------------------------------------------------------------------------------------------------------------------------------------------------------------------------------------------------------------------------------------------------------------------------------------------------------------------------------------------------------------------------------------------------------------------------------------------------------------------------------------------------------------------------------------------------------------------------------------------------------------------------------------------------------------------------------------------------------------------------------------------------------------|
| Undergoing psychological and emotional adjustment from beliefs of ‘fighting’ or ‘pushing through’ to balancing rest with activity | <p><i>“For a while I was being stubborn. I was trying to fight through it and I thought I could push through this thing. But I found out to my own detriment that pushing through doesn’t work. It just makes me worse, way worse...” – P10, Ireland</i></p>                                                                                                                                                                                                                                                                                                                                                                                                                                                                                                                                                                                                                                                                                                                                                                                                                                                                                                                                                                                                                                                                                                                                                                                 |
|                                                                                                                                   | <p><i>“What I ...say to people who are you know new at being long-haulers is that you have to be very patient and forgiving of yourself because there is a very human element to as soon as you start to feel remotely better, you instantly think, okay I’m cured, I can go throw myself right back into my old pre COVID routine, I am healed and boy is this place a mess from all the stuff that fell off my plate when I wasn’t feeling well and I was having all these symptoms. So, I’m just going to roll up my sleeves and now that I’m feeling better again, I’m going to take care of it all in one day... you have no idea where the boundary was because you’re not just inching over that line. That line is way in your rear-view mirror. You just completely fling yourself back at your regular routine... before you finally start to internalize okay my circumstances have changed, I’m not able-bodied anymore, I can’t do what I used to do, I’m not back to my old baseline. And it’s a huge emotional and psychological adjustment to internalize that, to acknowledge that okay maybe the day will eventually come where I’ll be healthy and whole and able-bodied again. But I can’t get from here to there by treating myself as able-bodied and by making the assumption that every time I’m feeling better, I can revert to all of the activities that I used to be able to get through.” – P25, Canada</i></p> |
| Making sacrifices                                                                                                                 | <p><i>“...you do feel like your illness does control you. I know people do say don’t let the illness control you, you control it. So, you can try and do that. You can pace and you can rest and you know you can do things bite size and with a lot of planning obviously. But the sad fact is that you know there are some things that you just cannot do. I cannot go to a restaurant... I couldn’t sit upright for that long. No way. Or go to the cinema. I mean these are things that we took for granted. I haven’t driven for about eight months now because I don’t trust my cognition and I don’t trust myself being upright. I’ve driven on some of those dangerous roads in the world in New Zealand and South Africa and then now you know I can’t even drive the kids to school. I mean that’s a huge change.” – P31, UK</i></p>                                                                                                                                                                                                                                                                                                                                                                                                                                                                                                                                                                                               |
|                                                                                                                                   | <p><i>“I didn’t know about pacing, which I had advice from a CBT therapist. The challenge was am I going to shower or am I going to brush my teeth today. That’s how low... it’s like I really changed my personality... for people who don’t have chronic illness, like me, it was like I was becoming a different person. So, I’d never been in a situation where my energy was so low.” – P3, UK</i></p>                                                                                                                                                                                                                                                                                                                                                                                                                                                                                                                                                                                                                                                                                                                                                                                                                                                                                                                                                                                                                                  |
|                                                                                                                                   | <p><i>“I think the isolation... has been a huge challenge. Like you’re very isolated because... you don’t want to be moaning at people all the time. You know you don’t want to go somewhere with someone and then say ‘actually I have to sit down, you know I can’t you know keep going’ or you know be in a restaurant and say ‘well actually I need to go home now because I’m too tired to.’ I think one of the challenges is social isolation because I would have been a very social person and I would have been... obviously at work I would see lots of people and whatever and I find that a challenge.” – P9, Ireland</i></p>                                                                                                                                                                                                                                                                                                                                                                                                                                                                                                                                                                                                                                                                                                                                                                                                    |
|                                                                                                                                   | <p><i>“It takes all of my energy to fulfil my parental obligations when [my kids are] around and then it takes the entire week when they’re gone for me to recover and have to be in the place to repeat that cycle all over again... There isn’t any extra capacity for me to be working as a kindergarten teacher, even though I was only a morning only kindergarten teacher to begin with. I don’t have the energy to do the physical aspect of that job, the mental aspect of that job, the emotional aspect of that job in addition to running my basics of life. I just don’t have that capacity to spare yet.” – P25, Canada</i></p>                                                                                                                                                                                                                                                                                                                                                                                                                                                                                                                                                                                                                                                                                                                                                                                                 |

| Challenges with Pacing            | Supportive Quotes                                                                                                                                                                                                                                                                                                                                                                                                                                                                                                                                                                                                                                                                                                                                                                                                                                                             |
|-----------------------------------|-------------------------------------------------------------------------------------------------------------------------------------------------------------------------------------------------------------------------------------------------------------------------------------------------------------------------------------------------------------------------------------------------------------------------------------------------------------------------------------------------------------------------------------------------------------------------------------------------------------------------------------------------------------------------------------------------------------------------------------------------------------------------------------------------------------------------------------------------------------------------------|
| Encountering unexpected obstacles | <i>"Everything has to be planned around my, I suppose, near disability you know. So, I do make a structure everyday and I try to keep it. Some days it could go off. A phone could ring and I don't answer it and then people get mad at me, 'I was ringing you all day and you never rang.' But if I take another call for half an hour to an hour on top of something else, I literally, my voice goes raspy, my oxygen drops down and I roll up like a ball in the bed." – P6, Ireland</i>                                                                                                                                                                                                                                                                                                                                                                                 |
|                                   | <i>"It's a lot of spoons and energy to give to managing my own healthcare... [it] should be a nice little administrative procedure but it's not. They require like all of my files and all of my information and my doctor is just not going to do it... So, I have to do it myself." – P14, Canada</i>                                                                                                                                                                                                                                                                                                                                                                                                                                                                                                                                                                       |
|                                   | <i>"Sometimes it's born out of necessity, physical exertion if I have to... so there was an incident recently where there was a [parcel] that I was expecting. The courier just drove past and didn't deliver, even though I stayed home all day for it, which I normally do anyway. But then I got an email saying that it was being held at an office 2km away. I had to turn up in person and I had to bring ID... I waited for a day when I was a bit better. I took my passport. Luckily the underground station is not very far. It's about 200 metres from here. So, I took the underground and on the other side it was another 200 metres walk. I got the parcel. It was large. It was eight kilograms. I was carrying it like this. I'm obviously very cautious with money, so I didn't call a taxi. I took the subway back. Well, did I pay for it." – P31, UK</i> |

459

#### 460 **4) Experiencing consequences of not pacing**

461 Participants described that if they did not or could not pace effectively, they faced consequences. Multiple  
462 participants referred to 'suffering' if they were unable to pace, or if they engaged in activities that were  
463 beyond their energy capacity. A lack of the ability or resources to pace, could lead to a relapse, crash, or  
464 exacerbation of symptoms (which could encompass physical, mental, emotional, and cognitive domains). For  
465 example, some participants would experience headaches, nausea, and cognitive challenges.

466 *"If I overdo it now, I would definitely have some sort of a relapse... I think that it shouldn't be that*  
467 *hard to change the tire, but I suppose it is when you have something like I have... the pacing is*  
468 *working. Like I've rested now the last three weeks, but I'm still not right. I'm still not back to where I*  
469 *was three weeks ago... I have the fear now that I will get a relapse. I know I will if I do too much. It's*  
470 *just pacing is definitely the way to go... Because if I don't, I suffer and I mean I don't want to suffer*  
471 *the way I suffered the last three weeks." – P10, Ireland*

472 Symptoms experienced during a crash led to reduced function. Some participants described that they  
473 would be temporarily bed-ridden, or “*physically paralysed*” (P6, Ireland). Participants explained that the  
474 decrease in function they experienced during a crash had consequences for their ability to engage in  
475 employment and other activities. This was frustrating for participants who wanted to keep busy, or were  
476 accustomed to a higher level of activity.

477 *“It just feels like my brain is scrambled, like I can’t get things organised in my head anymore. I have to*  
478 *go lay down and not do anything which... I like being productive. I don’t like doing that. It’s like what*  
479 *are you supposed to do, just stop and rest? Like, I guess so. Every time I try to get out of it like sooner*  
480 *and my body wants to, I could feel it coming back. But the more I rest and not think about anything*  
481 *stressful, I think that’s akin to it feels like my mind is like it was inflamed and now it’s like calming*  
482 *down type thing. Once I get to a level where it’s low enough in terms of like this so-called*  
483 *inflammation in my mind, I’m able to work again. It takes about two to three days.” – P23, US*

484 There was also tangible pressure experienced to continue to engage in employment, as being unable  
485 to do so resulted in lost income and financial insecurity.

486 *“I lost like \$10,000 of my salary because of choices I had to make because I had to manage Long*  
487 *COVID... So, there’s a pressure to maintain wellness... because I can’t afford to not be well. So that*  
488 *can be a bit of a pressure but it also helps to have a bit more discipline and pace in myself to try to*  
489 *stay well.” – P1, UK*

490

## 491 **5) Conceptualising and describing pacing using analogies and metaphors**

492 Participants used a range of analogies and metaphors to conceptualise and to describe the process of pacing.  
493 Examples of analogies and metaphors used by participants included Spoon Theory, budgeting energy, staying  
494 within an ‘energy envelope’ and ‘stoplight’ (see Figure 2). Some participants articulated the importance of  
495 using analogies and metaphors to describe pacing to others. This helped to validate the utility of pacing and

496 to make it more tangible (for themselves and others). For example, “[Spoon Theory is] a really helpful way of  
497 just naming what you’re working with.” (P40, US).

498 *Insert Figure 2: Analogies and Metaphors for Pacing*

### 499 **Spoon Theory**

500 Spoon Theory is based on the premise that only a finite number of spoons can be allocated to activities  
501 throughout the day, and day-to-day the number of spoons available can change (41). Participants who knew  
502 about and discussed Spoon Theory recognised its origins from within the community of people living with  
503 chronic disability (Figure 2). As this participant eloquently describes, Spoon Theory is a helpful analogy to  
504 describe pacing in the context of episodic disability.

505 *“Spoon Theory, I’m going to [forget] the name of the person who came up with it... Anyway, it was*  
506 *someone with chronic illness who came up with spoon theory as a way of explaining the need to do*  
507 *pacing when it comes to how much energy you have to give and that it isn’t a solid block of energy*  
508 *that will be consistent every single day. It’s more like episodic illness where some days you have say a*  
509 *bank of 10 spoons to use to get you through your activity and different activities will require more*  
510 *spoons or fewer spoons. Say eating is one spoon and driving is three spoons, a conversation on the*  
511 *phone is three spoons if it’s social but if it’s the bank for insurance it might be five and so on and so*  
512 *forth. So... as you get to be more familiar and more aware with what your energy capacity is and how*  
513 *much any given activity takes out of you, you get better over time with planning how much energy to*  
514 *use on any given day.” – P25, Canada*

515 Participants communicated important insights about pacing using Spoon Theory. For example, one  
516 participant used Spoon Theory to communicate the sacrifices they made about what roles they could take on  
517 in life, based on their limited number of spoons:

518 *“Could I work if I wasn’t a single mom? Probably not. But it’s just I only have like say 20 spoons a day.*  
519 *The rest is 100. I might have 20 on the most amazing day. Usually, it’s like 10. So, I’m spending eight*

520 *of those on my kid and like life activities. There's just not much left for anything else at the moment*  
521 *and I don't have a lot of support too."* – P14, Canada

522

### 523 **Budgeting energy**

524 Several participants compared pacing and budgeting, *"knowing like how much energy I have, what I want to*  
525 *spend it on"* (P40, US), to not end up in an energy deficit or debt. Participants described the process of  
526 'saving their energy' through rest, and 'spending their energy' on tasks, emotion or physical exertion (Figure  
527 2).

528 *"If you use a lot of emotional energy, there's a lot of stuff going on around you, just your emotions or*  
529 *whatever, that can take a lot from you as well. [There are] three prongs to that. But definitely I have*  
530 *been better at knowing how to save my energy. It's not like I can just like say okay I rested yesterday,*  
531 *so I'll be fine today. That's not the way it is... Whereas if I used up a lot of energy yesterday, if I did...*  
532 *like if I went shopping yesterday, you know I might not be as able to do this [interview] today."* – P9,  
533 Ireland

534

### 535 **Energy Envelope**

536 Some participants in this study described pacing in order to remain within the 'energy envelope.' The  
537 envelope represented the amount of energy available to someone. Expending more energy than available  
538 will exceed the limits of the envelope (Figure 2).

539

### 540 **Stoplight**

541 One participant described a stoplight system that they used to guide their pacing efforts. They described  
542 identifying each given day as a 'red', 'yellow' or 'green' day. Red days represented low energy days; on these  
543 days, they would only perform basic necessary activities of daily living to avoid triggering symptom

544 exacerbation. Green days represented higher energy days; on these days, they could engage in higher level  
545 functional activities and leisure activities. Yellow days would fall in between (Figure 2).

546

### 547 ***Other analogies and metaphors***

548 Several other analogies and metaphors were used by participants to conceptualise and describe pacing. For  
549 example, participants described having a “*body battery*” (P40, US) that is drained by exertion and charged by  
550 rest. One participant described “*living in a land of eggshells*” (P4, UK) where “*I feel like I’ve got to hold myself*  
551 *back a little bit, like I’ve got to just slowly step on eggshells*” (P4, UK). This metaphor of walking on eggshells  
552 communicated the restraint required for pacing.

553

## 554 **DISCUSSION**

555 This study set out to describe the experiences of pacing among adults living with Long COVID in Canada,  
556 Ireland, UK, and US. Participants experienced pacing as being a helpful living strategy to prevent or reduce  
557 symptom exacerbation. Many were knowledgeable, and had learned about pacing through online  
558 community support groups for people living with Long COVID or other energy-limiting chronic conditions.  
559 However, the experiences of pacing were described as a ‘moving target’, involving many challenges, and  
560 requiring time, effort, and trial and error to implement effectively. Participants used analogies and  
561 metaphors to conceptualise and describe pacing, such as Spoon Theory, budgeting their energy, and staying  
562 within their energy envelope.

563 This study builds on previous work demonstrating that pacing is often a new concept for people  
564 living with Long COVID, and that learning to pace is challenging but critical in symptom management (42, 43).  
565 Participants in this study, described pacing as requiring extensive trial and error to find and maintain a  
566 balance between rest and exertion, adapting to fluctuations in energy levels and the presence and severity of  
567 symptoms over time. Participants also described that experiencing social inequities, and stigma or judgment  
568 posed substantial challenges to pacing. This points to the need for accessible social and disability supports to  
569 reduce barriers and challenges to implementing pacing (44, 45).



570 Findings from this study highlight how community support groups have been instrumental to  
571 participants' experiences of learning how to pace, specifically by acquiring knowledge about pacing. Support  
572 groups are helping individuals living with Long COVID to learn about pacing and to navigate challenges faced  
573 with pacing, while many health and rehabilitation providers remain uninformed about pacing resulting in  
574 scarcity of formalised supports for pacing (23). Support and community groups are instrumental in helping  
575 people living with Long COVID to learn about and implement pacing (23, 46). People living with Long COVID  
576 came together through online platforms and support groups early in the pandemic, before academic and  
577 medical attention had moved beyond the acute stages of COVID-19 (47). These platforms have remained  
578 valuable for people living with Long COVID; they have driven advocacy efforts and provided educational  
579 resources and social and emotional support (46, 48-50). However, some individuals living with Long COVID,  
580 particularly those experiencing cognitive impairment, may struggle to navigate the substantial amount  
581 information available on support groups, which may trigger feelings of overwhelm (46). Additionally, the  
582 onus to maintain and coordinate support groups requires effort and energy on the part of those with lived  
583 experiences who are leading the groups (23, 46). It may be particularly challenging for the organizers to  
584 attempt to field complex questions about pacing and other living strategies, and to provide individualized  
585 information. Despite potential limitations, peer-support groups for Long COVID remain a tremendous and  
586 valued resource, particularly as health care providers continue to build capacity and knowledge to more  
587 adequately meet the needs of people living with Long COVID (46, 51).

588 Participants described experiencing difficulty accessing health and rehabilitation providers who were  
589 knowledgeable about pacing in a timely manner. There is a need to educate health and rehabilitation  
590 providers about pacing as a supported self-management or living strategy for Long COVID, to increase access  
591 to specialised providers and clinics, and to facilitate access to community support groups (51). Evidence  
592 suggests that Long COVID support groups are disproportionately utilized by white people aged 35-55 years  
593 (46), resulting in many people living with Long COVID with limited access to information shared in support  
594 groups. Participants in this study described that health and rehabilitation professionals are lacking in

595 knowledge about pacing, despite existing guidelines and online resources (29, 50); participants were left  
596 waiting for lengthy periods of time to access specialised providers or clinics who could provide tailored  
597 guidance on managing Long COVID, echoing previous findings (52). Enhancing education of health and  
598 rehabilitation providers on Long COVID and living strategies, such as pacing, could help people living with  
599 Long COVID manage their symptoms better and feel more supported in their communities (53). Investing in  
600 and expanding access to specialised Long COVID clinics and providers also is important to ensure that people  
601 living with Long COVID are able to access more in-depth and tailored support for pacing as needed (52).  
602 Given that support groups will continue to fill gaps in knowledge about Long COVID management, including  
603 pacing, it is essential that they are engaged in research and knowledge translation efforts related to pacing,  
604 and that resources are directed toward these groups to support them in delivering critical information on  
605 pacing and other living strategies for people living with Long COVID (46).

606 Results in this study also highlight that the opportunity and ability to implement pacing and prioritise  
607 rest as a meaningful activity, are not equal for everyone. To prioritise rest, participants described needing to  
608 take time off work or to depend on family, friends, or caregivers to assist them with essential tasks and roles,  
609 such as housekeeping and childcare. This is consistent with the results of other research on the impact of  
610 Long COVID on employment and pacing (54, 55). If participants were unable to access employment or  
611 disability benefits, they were faced with the impossible choice between continuing to struggle with their  
612 health versus sacrificing financial stability to take time off work. Not all participants possessed strong social  
613 networks to help with childcare and day-to-day activities. Social inequities may influence the ability to  
614 prioritise and balance rest with activity, and impact access to healthcare, information and support for living  
615 strategies for people with Long COVID, as with other chronic illnesses (56-58). Therefore, some adults living  
616 with Long COVID may face greater challenges learning about pacing and accessing support to implement  
617 pacing compared to others. It is vital that work accommodations, insurance and disability benefits, and home  
618 and community-based services are made accessible to people living with Long COVID to facilitate  
619 implementation of pacing as a living strategy to reduce symptom exacerbation (44, 59-61).

620           The analogies and metaphors used by participants in this study to conceptualise pacing and to  
621 describe it to others may be powerful communication tools for other people living with Long COVID and  
622 other energy-limiting conditions. People living with Long COVID have broadly reported dismissal and  
623 invalidation of their symptoms by healthcare providers, friends, and family members (62-65). Validation of  
624 symptoms is an important aspect of care that people living with Long COVID are seeking from health  
625 providers (66-68). Rest, a meaningful activity required for pacing, is undervalued in the context of  
626 contemporary ‘hustle culture’, which prioritises productivity and busyness (69). Therefore, efforts to pace  
627 may be dismissed, minimized or criticized by others. This was the case for many of the participants in this  
628 study; even participants themselves had to undergo psychological adjustment to embrace pacing. For people  
629 living with Long COVID, their healthcare providers, and their communities to understand pacing, it is  
630 important to have clear and relatable means of communicating what pacing is and how it works. Analogies  
631 and metaphors shared by participants in this study, such as balancing activities and rest, Spoon Theory,  
632 budgeting energy, and staying within the energy envelope, are examples of how information about pacing  
633 can be effectively communicated with providers and caregivers.

634           Strengths of this study include the inclusion of participants living with Long COVID in four countries,  
635 our community-engaged team-based approach, and community-led recruitment with purposive sampling to  
636 achieve diversity in gender, sexual orientation, and race. The aim of the parent study was to describe  
637 experiences of disability among adults living with Long COVID, and not specifically to explore experiences  
638 with pacing (11). However, the amount and the richness of data on the experiences of pacing from 37 out of  
639 40 of the participants highlighted the importance and utility of this living strategy. While participants were  
640 from Canada, Ireland, UK, and US, our aim was to not compare and contrast between countries; instead we  
641 analyzed interview data as one collective dataset. Recruitment through community support groups fostered  
642 trust among participants and likely contributed to the richness of interview data. However, as participants  
643 were actively engaged in community support groups and networks, they may have been more  
644 knowledgeable about Long COVID, pacing, and existing supports than the broader population of persons

645 living with Long COVID. Finally, our study was focused in four high-income settings; results may not be  
646 transferable to low- and middle-income settings, but provide important foundations to further explore  
647 pacing in other contexts.

648 Future directions for research on pacing should include studies that explore the potential for  
649 technology to facilitate pacing for adults living with Long COVID, and studies that assess the co-creation and  
650 implementation of pacing strategies and programming into healthcare systems and social support  
651 institutions. People living with Long COVID should be engaged in the design and implementation of future  
652 research on pacing (68, 70). People living with Long COVID have used smart watches and other technology to  
653 guide their pacing efforts (71). Research on pacing as a rehabilitation strategy and intervention and the role  
654 of technology to support pacing may help to develop evidence-based guidelines that can be implemented by  
655 people living with Long COVID and their health care providers (72). Research should also explore knowledge,  
656 experiences, and utility of pacing among populations who are under-represented in this study and other  
657 research on pacing, such as adolescents, children, and young people living with Long COVID, people living in  
658 low- and middle-income countries, and people from underrepresented racial and sexual and gender groups.

659

## 660 **CONCLUSION**

661 Pacing is a critical strategy used by people living with Long COVID to mitigate, manage and stabilize  
662 symptoms; however, pacing is experienced as a “moving target” for adults living with Long COVID. Even after  
663 learning about pacing, adults living with Long COVID may experiences challenges with pacing as well as  
664 consequences of not pacing. Adults living with Long COVID use analogies and metaphors to conceptualise  
665 and describe pacing, for enhancing understanding and support for pacing. Health and rehabilitation  
666 providers should consider that pacing is challenging and complex, and work collaboratively with patients to  
667 implement this strategy, when appropriate.

668

## 669 **ACKNOWLEDGEMENTS**

670 We thank the participants for their contributions to this study and the community organizations who  
671 collaborated in this work. We acknowledge the following community collaborator organizations who were  
672 instrumental in this study: the Patient-Led Research Collaborative (PLRC), Long COVID Physio, Long COVID  
673 Support UK, COVID Long Haulers Support Group Canada, Long COVID Advocacy Ireland, and Long COVID  
674 Ireland.

675

676

## REFERENCES

- 677 1. Al-Aly Z, Davis H, McCorkell L, Soares L, Wulf-Hanson S, Iwasaki A, et al. Long COVID science, research  
678 and policy. *Nature Medicine*. 2024.
- 679 2. National Academies of Sciences, Engineering, and Medicine. A Long COVID Definition: A Chronic,  
680 Systemic Disease State with Profound Consequences. 2024.
- 681 3. O'Mahoney LL, Routen A, Gillies C, Ekezie W, Welford A, Zhang A, et al. The prevalence and long-  
682 term health effects of Long Covid among hospitalised and non-hospitalised populations: A systematic review  
683 and meta-analysis. *EclinicalMedicine*. 2023;55.
- 684 4. Woodrow M, Carey C, Ziauddeen N, Thomas R, Akrami A, Lutje V, et al. Systematic review of the  
685 prevalence of Long Covid. *medRxiv*. 2022:2022.11.06.22281979.
- 686 5. Government of Canada. COVID-19: Longer-term symptoms among Canadian adults - Highlights2022  
687 Spring 2023; 2023(July 13). Available from: [https://health-infobase.canada.ca/covid-19/post-covid-  
688 condition/](https://health-infobase.canada.ca/covid-19/post-covid-condition/).
- 689 6. Davis HE, Assaf GS, McCorkell L, Wei H, Low RJ, Re'em Y, et al. Characterizing long COVID in an  
690 international cohort: 7 months of symptoms and their impact. *EclinicalMedicine*. 2021;38:101019.
- 691 7. Office for National Statistics. Self-reported coronavirus (COVID-19) infections and associated  
692 symptoms, England and Scotland: November 2023 to March 2024. Office for National Statistics; 2024.
- 693 8. O'Brien KK, Brown DA, McDuff K, Clair-Sullivan NS, Solomon P, Carusone SC, et al. Conceptualising  
694 the episodic nature of disability among adults living with Long COVID: a qualitative study. *BMJ global health*.  
695 2023;8(3):e011276.
- 696 9. O'Brien KK, Brown DA, Bergin C, Erlandson KM, Vera JH, Avery L, et al. Long COVID and episodic  
697 disability: advancing the conceptualisation, measurement and knowledge of episodic disability among people  
698 living with Long COVID—protocol for a mixed-methods study. *BMJ open*. 2022;12(3):e060826.
- 699 10. Brown DA, O'Brien KK. Conceptualising long COVID as an episodic health condition. *BMJ Global  
700 Health*. 2021;6(9):e007004.
- 701 11. O'Brien KK, Brown DA, McDuff K, St. Clair-Sullivan N, Chan Carusone S, Thomson C, et al. Conceptual  
702 framework of episodic disability in the context of Long COVID: Findings from a community-engaged  
703 international qualitative study. *medRxiv*. 2024:2024.05.28.24308048.
- 704 12. Stelson EA, Dash D, McCorkell L, Wilson C, Assaf G, Re'em Y, et al. Return-to-work with long COVID:  
705 an episodic disability and total Worker Health® analysis. *Social Science & Medicine*. 2023;338:116336.

- 706 13. Anderson E, Hunt K, Wild C, Nettleton S, Ziebland S, MacLean A. Episodic disability and adjustments  
707 for work: the ‘rehabilitative work’ of returning to employment with Long Covid. *Disability & Society*. 2024;1-  
708 23.
- 709 14. Menges D, Ballouz T, Anagnostopoulos A, Aschmann HE, Domenghino A, Fehr JS, et al. Burden of  
710 post-COVID-19 syndrome and implications for healthcare service planning: A population-based cohort study.  
711 *PloS one*. 2021;16(7):e0254523.
- 712 15. Nielsen K, Yarker J. “It’s a rollercoaster”: the recovery and return to work experiences of workers with  
713 long COVID. *Work & Stress*. 2023:1-29.
- 714 16. Cutler DM. The Costs of Long COVID. *JAMA Health Forum*. 2022;3(5):e221809-e.
- 715 17. McCorkell L, Peluso MJ. Long COVID research risks losing momentum – we need a moonshot. *nature*.  
716 2023.
- 717 18. Leggat FJ, Heaton-Shrestha C, Fish J, Siriwardena AN, Domeney A, Rowe C, et al. An exploration of  
718 the experiences and self-generated strategies used when navigating everyday life with Long Covid. *BMC*  
719 *Public Health*. 2024;24(1):789.
- 720 19. Ireson J, Taylor A, Richardson E, Greenfield B, Jones G. Exploring invisibility and epistemic injustice in  
721 Long Covid—A citizen science qualitative analysis of patient stories from an online Covid community. *Health*  
722 *Expectations*. 2022;25(4):1753-65.
- 723 20. O'Brien KK, Davis AM, Strike C, Young NL, Bayoumi AM. Putting episodic disability into context: a  
724 qualitative study exploring factors that influence disability experienced by adults living with HIV/AIDS.  
725 *Journal of the International AIDS Society*. 2009;12:1-11.
- 726 21. Wurz A, Culos-Reed SN, Franklin K, DeMars J, Wrightson JG, Twomey R. "I feel like my body is  
727 broken": exploring the experiences of people living with long COVID. *Quality of Life Research*.  
728 2022;31(12):3339-54.
- 729 22. Maxwell E. Living with Covid19. A dynamic review of the evidence around ongoing Covid19  
730 symptoms (often called Long Covid) NIHR CED. 2020;30.
- 731 23. Garner P. Long covid and self-help pacing groups—getting by with a little help from our friends.  
732 2020.
- 733 24. Sanal-Hayes NE, Mclaughlin M, Hayes LD, Mair JL, Ormerod J, Carless D, et al. A scoping review of  
734 ‘Pacing’ for management of Myalgic Encephalomyelitis/Chronic Fatigue Syndrome (ME/CFS): lessons learned  
735 for the long COVID pandemic. *Journal of Translational Medicine*. 2023;21(1):720.
- 736 25. Goudsmit EM, Nijs J, Jason LA, Wallman KE. Pacing as a strategy to improve energy management in  
737 myalgic encephalomyelitis/chronic fatigue syndrome: a consensus document. *Disability and rehabilitation*.  
738 2012;34(13):1140-7.
- 739 26. Antcliff D, Keenan AM, Keeley P, Woby S, McGowan L. Survey of activity pacing across healthcare  
740 professionals informs a new activity pacing framework for chronic pain/fatigue. *Musculoskeletal care*.  
741 2019;17(4):335-45.
- 742 27. World Physiotherapy. World Physiotherapy response to COVID-19. Safe rehabilitation approaches for  
743 people living with Long COVID: physical activity and exercise. 2021; (ISBN: 978-1-914952-00-5). Available  
744 from: [https://world.physio/sites/default/files/2021-07/Briefing-Paper-9-Long-Covid-FINAL-English-](https://world.physio/sites/default/files/2021-07/Briefing-Paper-9-Long-Covid-FINAL-English-202107.pdf)  
745 [202107.pdf](https://world.physio/sites/default/files/2021-07/Briefing-Paper-9-Long-Covid-FINAL-English-202107.pdf).
- 746 28. Ghali A, Lacombe V, Ravaiau C, Delattre E, Ghali M, Urbanski G, et al. The relevance of pacing  
747 strategies in managing symptoms of post-COVID-19 syndrome. *Journal of Translational Medicine*.  
748 2023;21(1):375.

- 749 29. ME Action Network, Patient-Led Research Collaborative. Pacing and Management Guide for ME/CFS  
750 and Long COVID ME Action Network [Available from: [https://www.meaction.net/wp-](https://www.meaction.net/wp-content/uploads/2023/02/Pacing-Guide-Clinicians.FINAL2_.pdf)  
751 [content/uploads/2023/02/Pacing-Guide-Clinicians.FINAL2\\_.pdf](https://www.meaction.net/wp-content/uploads/2023/02/Pacing-Guide-Clinicians.FINAL2_.pdf)].
- 752 30. COVID Long Haulers Support Group Canada (Goulding). COVID Long Haulers Support Group Canada -  
753 <https://covidlonghaulcanada.com/> 2021 [Available from: <https://covidlonghaulcanada.com/>].
- 754 31. Long COVID Ireland. Long COVID Ireland - <https://www.longcovidireland.org/>  
755 <https://www.longcovidireland.org/2021> [Available from: <https://www.longcovidireland.org/>].
- 756 32. Long COVID Physio. Long COVID Physio - <https://longcovid.physio/> [https://www.physio-](https://www.physio-pedia.com/Long_COVID2021)  
757 [pedia.com/Long\\_COVID2021](https://www.physio-pedia.com/Long_COVID2021) [Available from: <https://lnk.bio/YUiz>].
- 758 33. Long COVID Support. Long COVID Support - <https://www.longcovid.org/> 2021 [Available from:  
759 <https://www.longcovid.org/>].
- 760 34. Patient-Led Research Collaborative. Patient-Led Research Collaborative -  
761 <https://patientresearchcovid19.com/> 2021 [Available from: <https://patientresearchcovid19.com/>].
- 762 35. Soriano JB, Murthy S, Marshall JC, Relan P, Diaz JV, Condition WHOCCDWGoP-C-. A clinical case  
763 definition of post-COVID-19 condition by a Delphi consensus. *Lancet Infect Dis*. 2021.
- 764 36. O'Brien KK, Hanna S, Gardner S, Bayoumi AM, Rueda S, Hart TA, et al. Validation of the Episodic  
765 Disability Framework with adults living with HIV. *Disabil Rehabil*. 2014;36(4):319-29.
- 766 37. O'Brien KK, Bayoumi AM, Strike C, Young NL, Davis AM. Exploring disability from the perspective of  
767 adults living with HIV/AIDS: development of a conceptual framework. *Health Qual Life Outcomes*. 2008;6:76.
- 768 38. Hsieh HF, Shannon SE. Three approaches to qualitative content analysis. *Qual Health Res*.  
769 2005;15(9):1277-88.
- 770 39. QSR International. NVivo qualitative data analysis software. Version 12. 2018.
- 771 40. ME Action Network. ME ACTION: ME Action Network; [Available from: <https://www.meaction.net/>].
- 772 41. MEAction. Spoon theory [Available from: [https://me-pedia.org/wiki/Spoon\\_theory#cite\\_note-](https://me-pedia.org/wiki/Spoon_theory#cite_note-TheSpoonTheory-1)  
773 [TheSpoonTheory-1](https://me-pedia.org/wiki/Spoon_theory#cite_note-TheSpoonTheory-1)].
- 774 42. Brown D, Oller D, Hassell H, DeChane T, Appel C, Hagey S, et al. Physical Therapists Living With Long  
775 COVID, Part 2: When "Keep Pushing" Isn't the Answer. 2021.
- 776 43. Eckey M, Li P, Morrison B, Davis RW, Xiao W. Patient-Reported Treatment Outcomes in ME/CFS and  
777 Long COVID. *medRxiv*. 2024:2024.11. 27.24317656.
- 778 44. Collective HC, Long COVID and Episodic Disability Study Team (O'Brien KK ML, Malli N, McDuff K,  
779 Chan Carusone S, Cheung A, Goulding S, Kelly M, O'Hara M, O'Connell S, O'Donovan I, Thomson C, Wei H,  
780 Stokes R, Fay J). Long COVID, Episodic Disability and Labour Force Participation: Calls to Action for  
781 Government, Employers, Human Resource (HR) Professionals, Insurers and Benefit Providers: Canada,  
782 Ireland, United Kingdom, United States of America. 2024.
- 783 45. The Long Haul: Forging a Path Through the Lingering Effects of COVID-19 Hearing before the House  
784 Committee on Energy and Commerce, Subcommittee on Health(2021).
- 785 46. Mullard JC, Kawalek J, Parkin A, Rayner C, Mir G, Sivan M, et al. Towards evidence-based and  
786 inclusive models of peer support for long covid: A hermeneutic systematic review. *Social Science & Medicine*.  
787 2023;320:115669.
- 788 47. Callard F, Perego E. How and why patients made Long Covid. *Social science & medicine*.  
789 2021;268:113426.

- 790 48. Ladds E, Rushforth A, Wieringa S, Taylor S, Rayner C, Husain L, et al. Developing services for long  
791 COVID: lessons from a study of wounded healers. *Clinical medicine*. 2021;21(1):59.
- 792 49. Rushforth A, Ladds E, Wieringa S, Taylor S, Husain L, Greenhalgh T. Long Covid—the illness narratives.  
793 *Social science & medicine*. 2021;286:114326.
- 794 50. Long COVID Physio. Pacing: Long COVID Physio; [Available from: <https://longcovid.physio/pacing>.
- 795 51. Kim C, Lin C, Wong M, Al Jarad SAH, Gao A, Kaufman N, et al. Experiences of physiotherapists  
796 working with adults living with Long COVID in Canada: a qualitative study. *BMJ open*. 2024;14(11):e086357.
- 797 52. Kingstone T, Taylor AK, O'Donnell CA, Atherton H, Blane DN, Chew-Graham CA. Finding the 'right' GP:  
798 a qualitative study of the experiences of people with long-COVID. *BJGP open*. 2020;4(5).
- 799 53. Razai MS, Al-Bedaery R, Anand L, Fitch K, Okechukwu H, Saraki TM, et al. Patients' Experiences of  
800 "Long COVID" in the community and recommendations for improving services: A quality improvement  
801 survey. *Journal of primary care & community health*. 2021;12:21501327211041846.
- 802 54. MacEwan SR, Rahrurkar S, Tarver WL, Eiterman LP, Melnyk H, Olvera RG, et al. The Impact of Long  
803 COVID on Employment and Well-Being: A Qualitative Study of Patient Perspectives. *Journal of General*  
804 *Internal Medicine*. 2024.
- 805 55. Meach R, Carless D, Sanal-Hayes NEM, McLaughlin M, Hayes LD, Mair JL, et al. An Adaptive Pacing  
806 Intervention for Adults Living With Long COVID: A Narrative Study of Patient Experiences of Using the  
807 PaceMe app. *Journal of Patient Experience*. 2024;11:23743735241272158.
- 808 56. Shabnam S, Razieh C, Dambha-Miller H, Yates T, Gillies C, Chudasama YV, et al. Socioeconomic  
809 inequalities of Long COVID: a retrospective population-based cohort study in the United Kingdom. *Journal of*  
810 *the Royal Society of Medicine*. 2023;116(8):263-73.
- 811 57. Van Wilder L, Pype P, Mertens F, Rammant E, Clays E, Devleeschauwer B, et al. Living with a chronic  
812 disease: insights from patients with a low socioeconomic status. *BMC family practice*. 2021;22:1-11.
- 813 58. Cheetham NJ, Bowyer V, Garcia MP, Bowyer RC, Carpentieri J, Guise A, et al. Social determinants of  
814 recovery from ongoing symptoms following COVID-19 in two UK longitudinal studies: a prospective cohort  
815 study. *medRxiv*. 2023:2023.12. 21.23300125.
- 816 59. Realize. Tips for people living with Long COVID on managing health care interactions and disability  
817 claims.
- 818 60. Realize. A roadmap for disability income benefits for people living with Long COVID.
- 819 61. DeMars J, O'Brien K, Minor A, Graham K, Goulding S, Brown DA, et al. Recommendations for  
820 employers, insurers, human resource professionals on return to work for people living with Long COVID.  
821 Realize Canada; 2022.
- 822 62. Au L, Capotescu C, Eyal G, Finestone G. Long covid and medical gaslighting: Dismissal, delayed  
823 diagnosis, and deferred treatment. *SSM-Qualitative Research in Health*. 2022;2:100167.
- 824 63. Russell D, Spence NJ, Chase J-AD, Schwartz T, Tumminello CM, Bouldin E. Support amid uncertainty:  
825 Long COVID illness experiences and the role of online communities. *SSM-Qualitative Research in Health*.  
826 2022;2:100177.
- 827 64. Pantelic M, Ziauddeen N, Boyes M, O'Hara ME, Hastie C, Alwan NA. Long Covid stigma: Estimating  
828 burden and validating scale in a UK-based sample. *PLoS One*. 2022;17(11):e0277317.
- 829 65. Byrne EA. Understanding Long Covid: Nosology, social attitudes and stigma. *Brain, behavior, and*  
830 *immunity*. 2022;99:17-24.



- 831 66. DeMars J, Brown DA, Angelidis I, Jones F, McGuire F, O'Brien KK, et al. What is safe long COVID  
832 rehabilitation? *Journal of Occupational Rehabilitation*. 2023;33(2):227-30.
- 833 67. Michelen M, Manoharan L, Elkheir N, Cheng V, Dagens A, Hastie C, et al. Characterising long COVID: a  
834 living systematic review. *BMJ Glob Health*. 2021;6(9).
- 835 68. Jones F, Domeny A, Fish J, Leggat F, Patel I, McRae J, et al. Using co-design methods to develop new  
836 personalised support for people living with Long Covid: The 'LISTEN' intervention. *Health Expectations*.  
837 2024;27(3):e14093.
- 838 69. Zhang X, Wang F, Shen Y, Zhang X, Cen Y, Wang B, et al. Symptoms and Health Outcomes Among  
839 Survivors of COVID-19 Infection 1 Year After Discharge From Hospitals in Wuhan, China. *JAMA Netw Open*.  
840 2021;4(9):e2127403.
- 841 70. Turner GM, McMullan C, Aiyegbusi OL, Hughes SE, Walker A, Jeyes F, et al. Co-production of a  
842 feasibility trial of pacing interventions for Long COVID. *Research Involvement and Engagement*. 2023;9(1):18.
- 843 71. Homewood S, editor Self-tracking to do less: An autoethnography of long COVID that informs the  
844 design of pacing technologies. *Proceedings of the 2023 CHI Conference on Human Factors in Computing*  
845 *Systems*; 2023.
- 846 72. O'Brien KK, McDuff K, Chattu VK, Churchill K, Colantonio A, Davenport TE, et al. A framework of  
847 research priorities in COVID rehabilitation from the Rehabilitation Science Research Network for COVID: an  
848 international consultation involving qualitative and quantitative research. *Disability and Rehabilitation*.  
849 2024:1-10.

850

# Experiences of pacing in the context of Long COVID

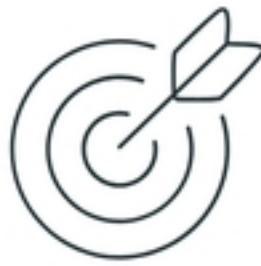

**Using pacing as a living strategy**

- Pacing to mitigate multidimensional health challenges
- Applying pacing to many types of activities
- Process of pacing experienced as a moving target
- Pacing experienced as a helpful strategy, but not a cure for Long COVID

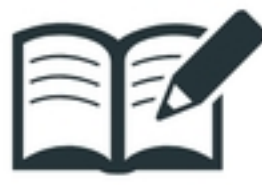

**Learning how to pace**

- Acquiring knowledge about pacing
- Developing strategies and skills to support pacing

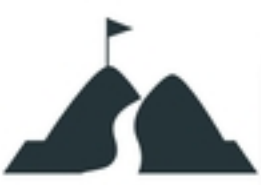

**Encountering challenges with pacing**

- Learning how to pace
- Experiencing inequitable access to pacing
- Experiencing stigma and judgement
- Undergoing psychological and emotional adjustment from beliefs of 'fighting' or 'pushing through' to balancing rest with activity
- Making sacrifices
- Encountering unexpected obstacles

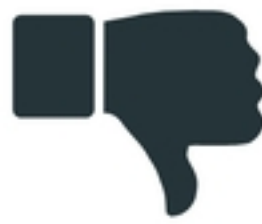

**Experiencing consequences of not pacing**

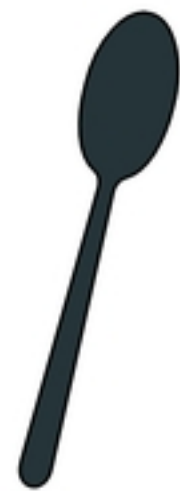

**Conceptualising and describing pacing using analogies or metaphors**

- Spoon Theory
- Budgeting energy
- Energy envelope
- Stoplight

Figure 1

## SPOON THEORY

“I’m timing things so that I’m doing my cooking more on the weeks when I don’t have my kids or I’ll do all the cooking on the weekend and then it’s just getting through the weekday and relying on leftovers. It’s trying to do my pacing and my planning so that I don’t run out of spoons, especially before the week is through and I’m not borrowing from my future self. My future self needs the spoons too.” - P25, Canada

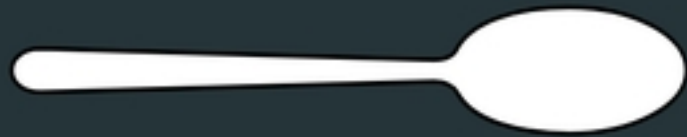

## ENERGY ENVELOPE

“[Pacing is] just trying to remain with as few symptoms as possible through pacing, through staying within like what’s called the energy envelope.” - P37, Ireland

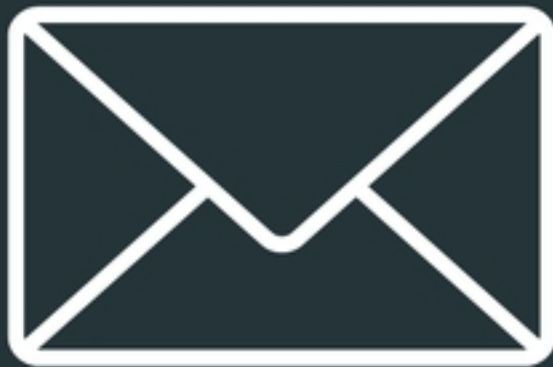

## BUDGETING ENERGY

“So, if I’m going to an event obviously, I have to conserve energy and pace myself. It’s like I’m putting money in my bank. I’m giving myself 2,000 euros which I wish I had and then I have to take all that out and I only have like -10 [euros]. So, everything is a plan.” - P7, Ireland

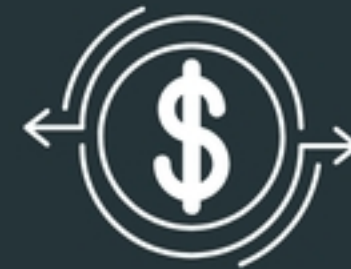

## STOPLIGHT

“On a red day that would be like a low spoon day you’re only focusing on the most basic things, the feeding yourself, the dressing yourself, you know. If you have a job, to do the job and if you’re a caregiver, you know the basics, the minimum basics of caring for others. If it’s a yellow light day adding in a few more things that are required not just desired and then on a green light day, that would be the highest functioning day. That’s when you have things that you want to do, not just the things that you need to do.” - P40, Canada

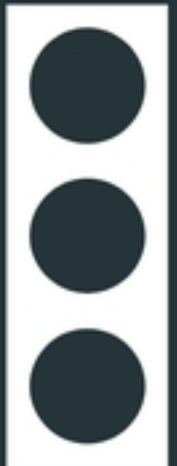

Figure 2
